# Supplementary material for: Galectin-8 binds to the Farnesylated C-terminus of K-Ras4B and Modifies Ras/ERK Signaling and Migration in Pancreatic and Lung Carcinoma Cells
Source: MDPI journal article supplement (doi:10.3390/cancers12010030), 2019-12-20

Fig.1

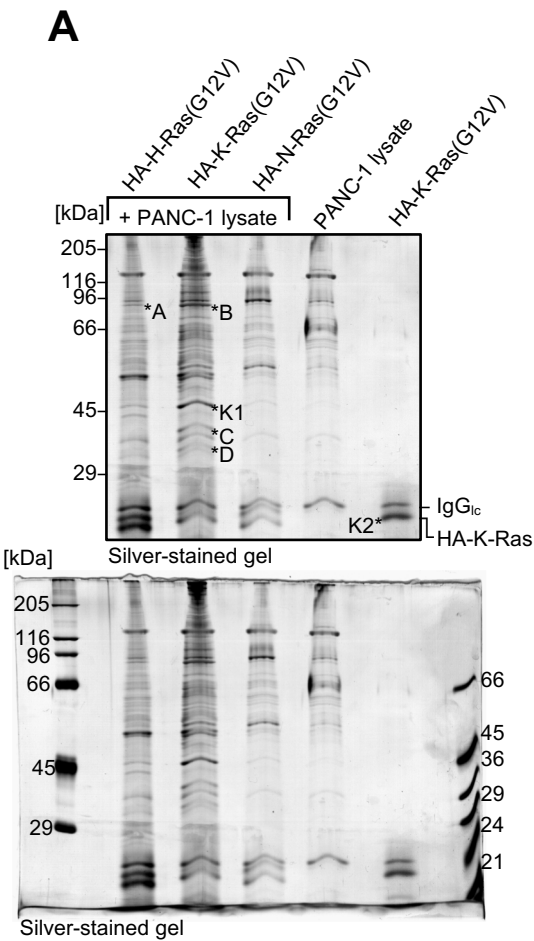

Fig.1

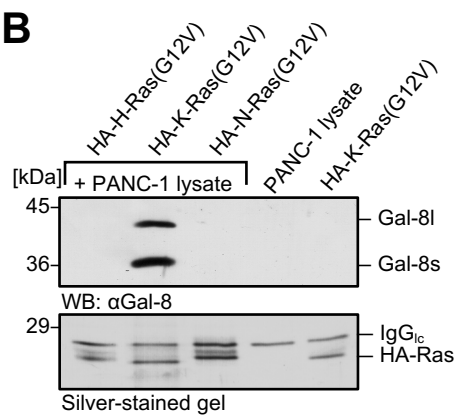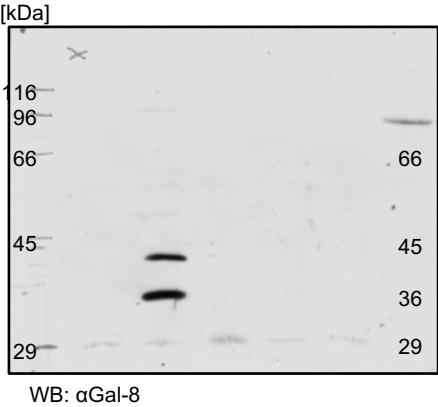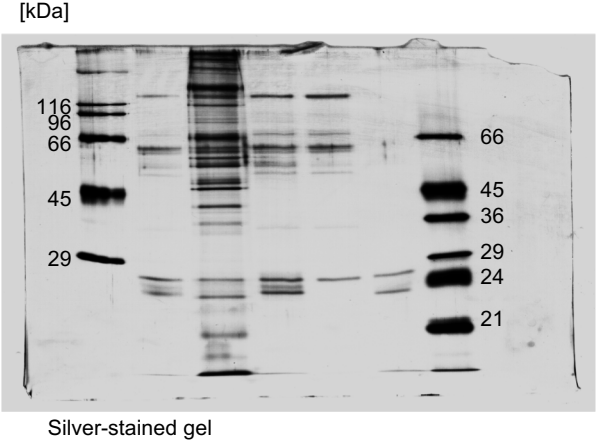

Fig.1

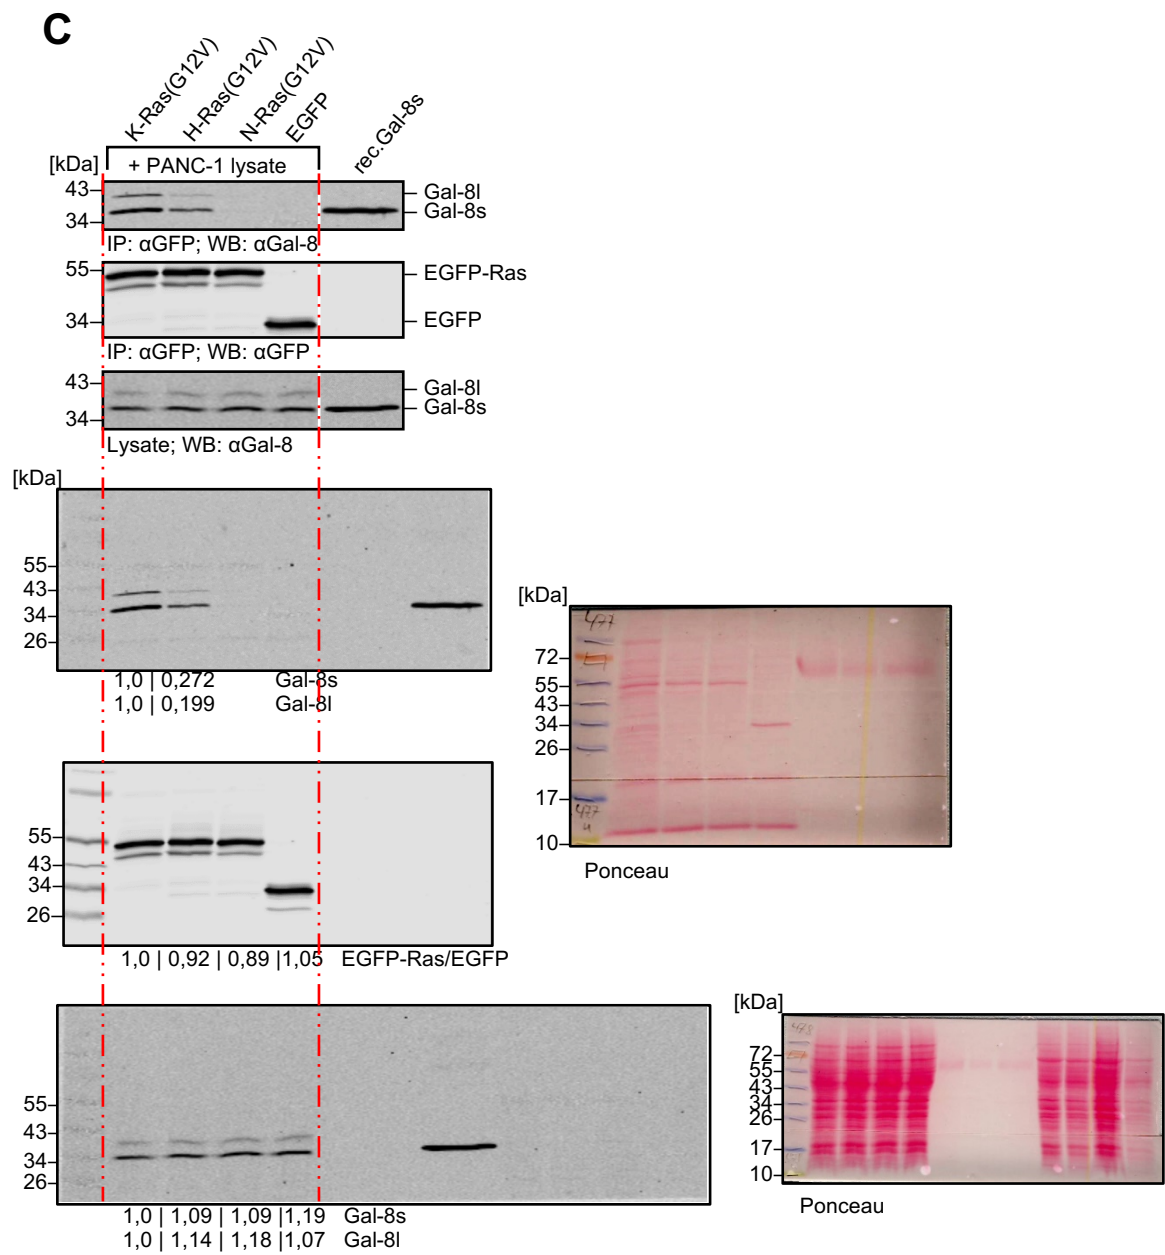

Fig.1

D

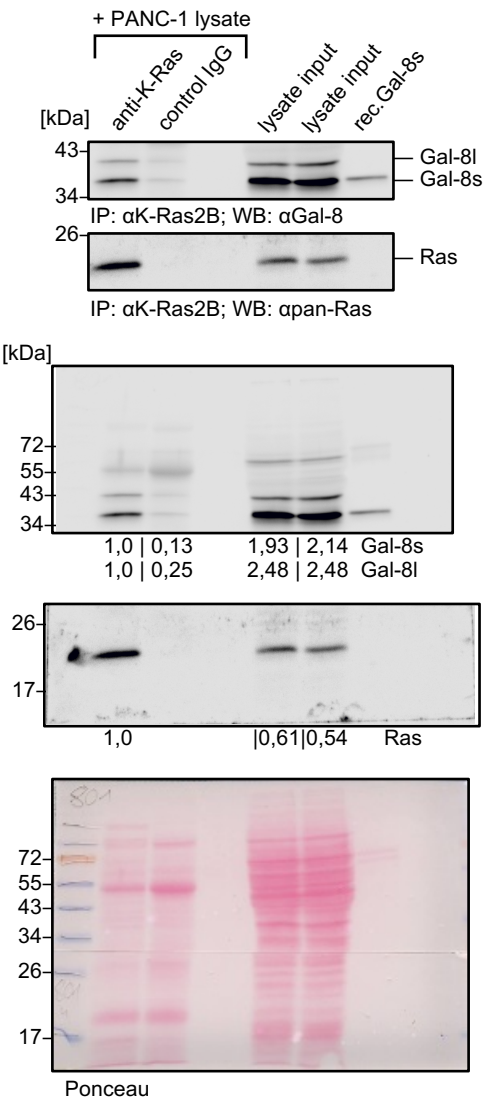



Fig.2

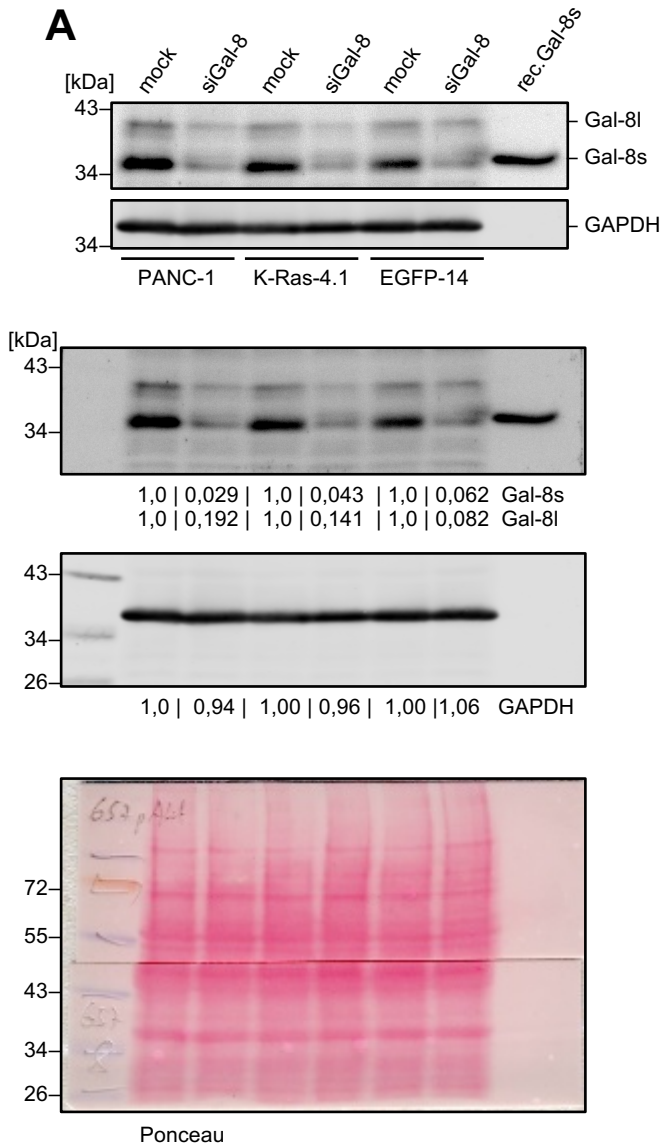

Fig.2

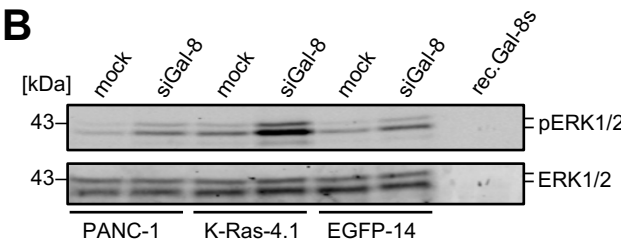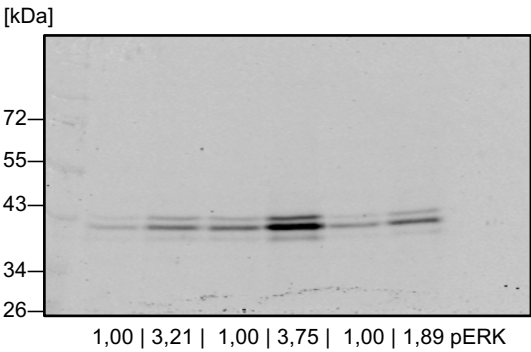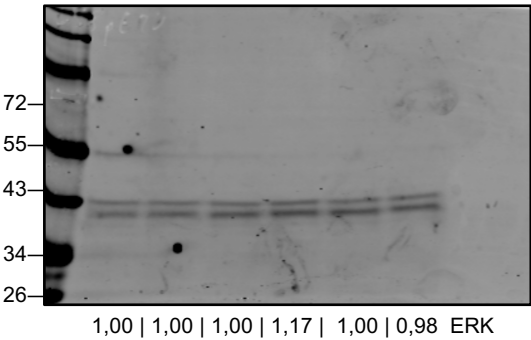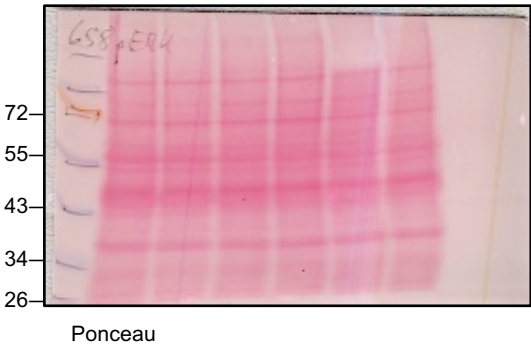

Fig.2

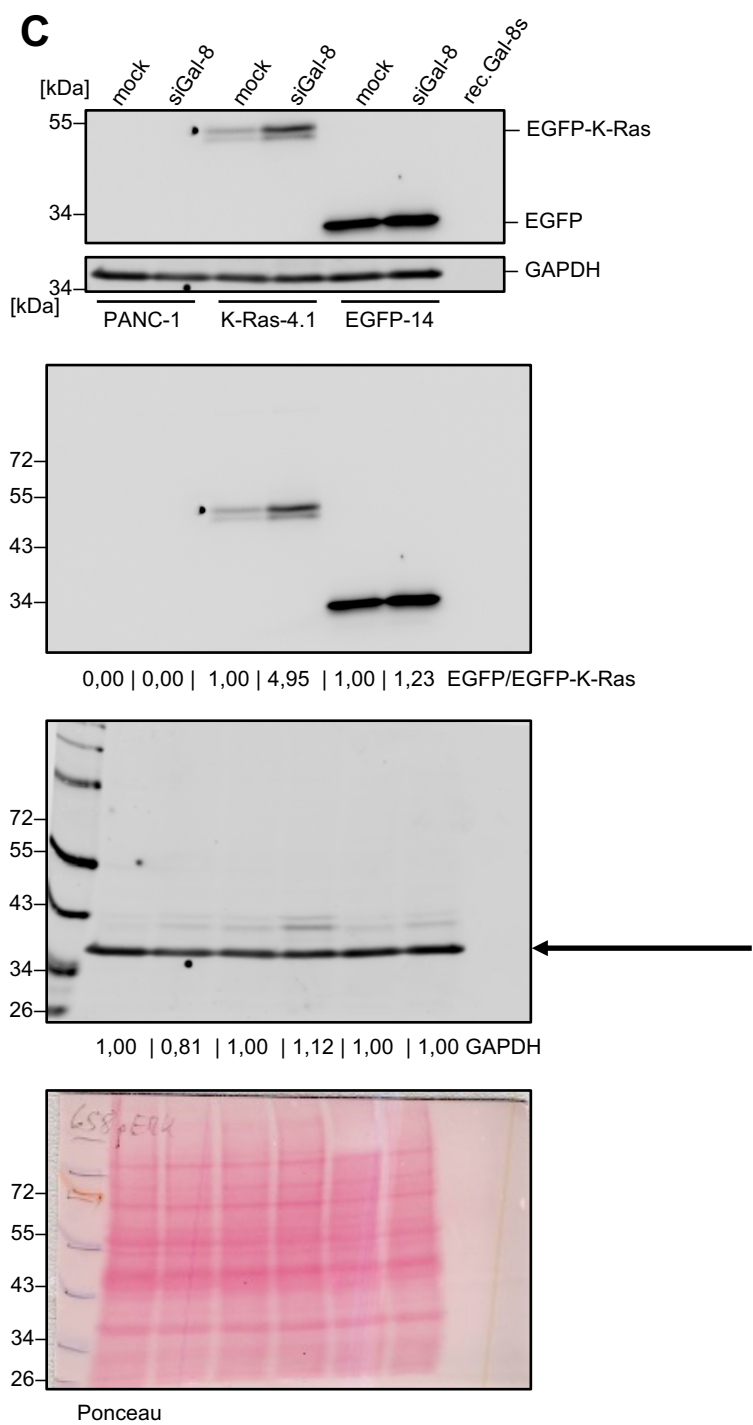

Fig.2

D

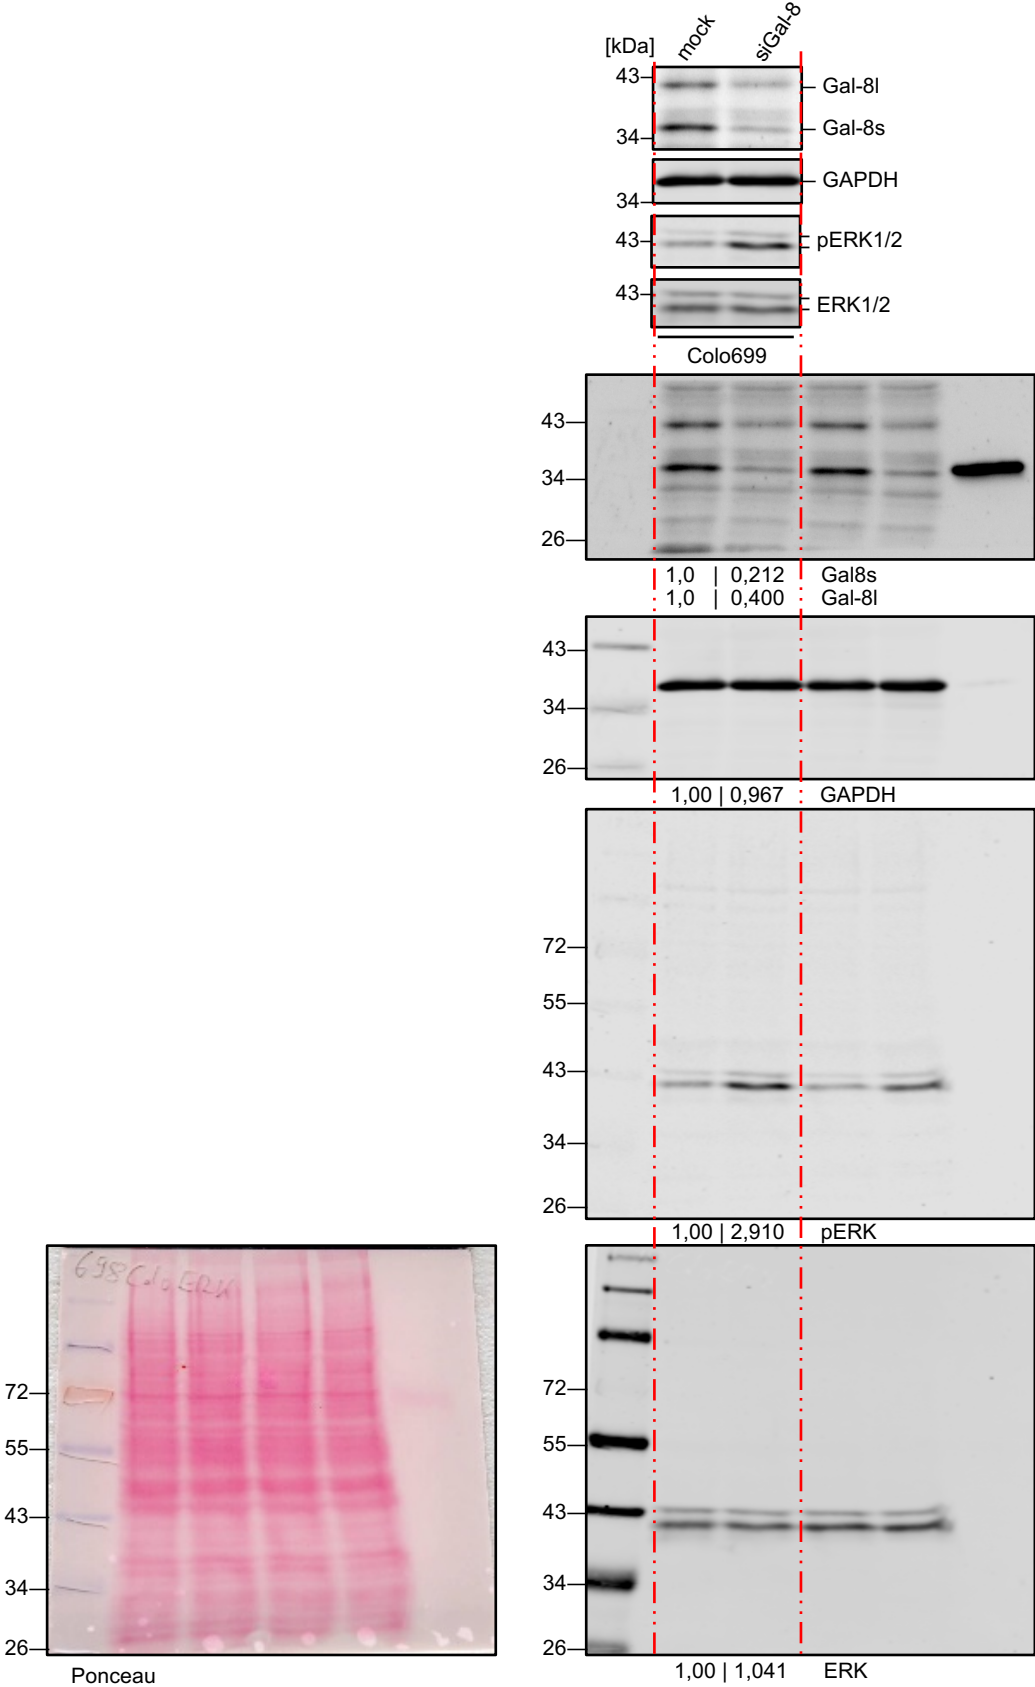

## Fig.2

# E

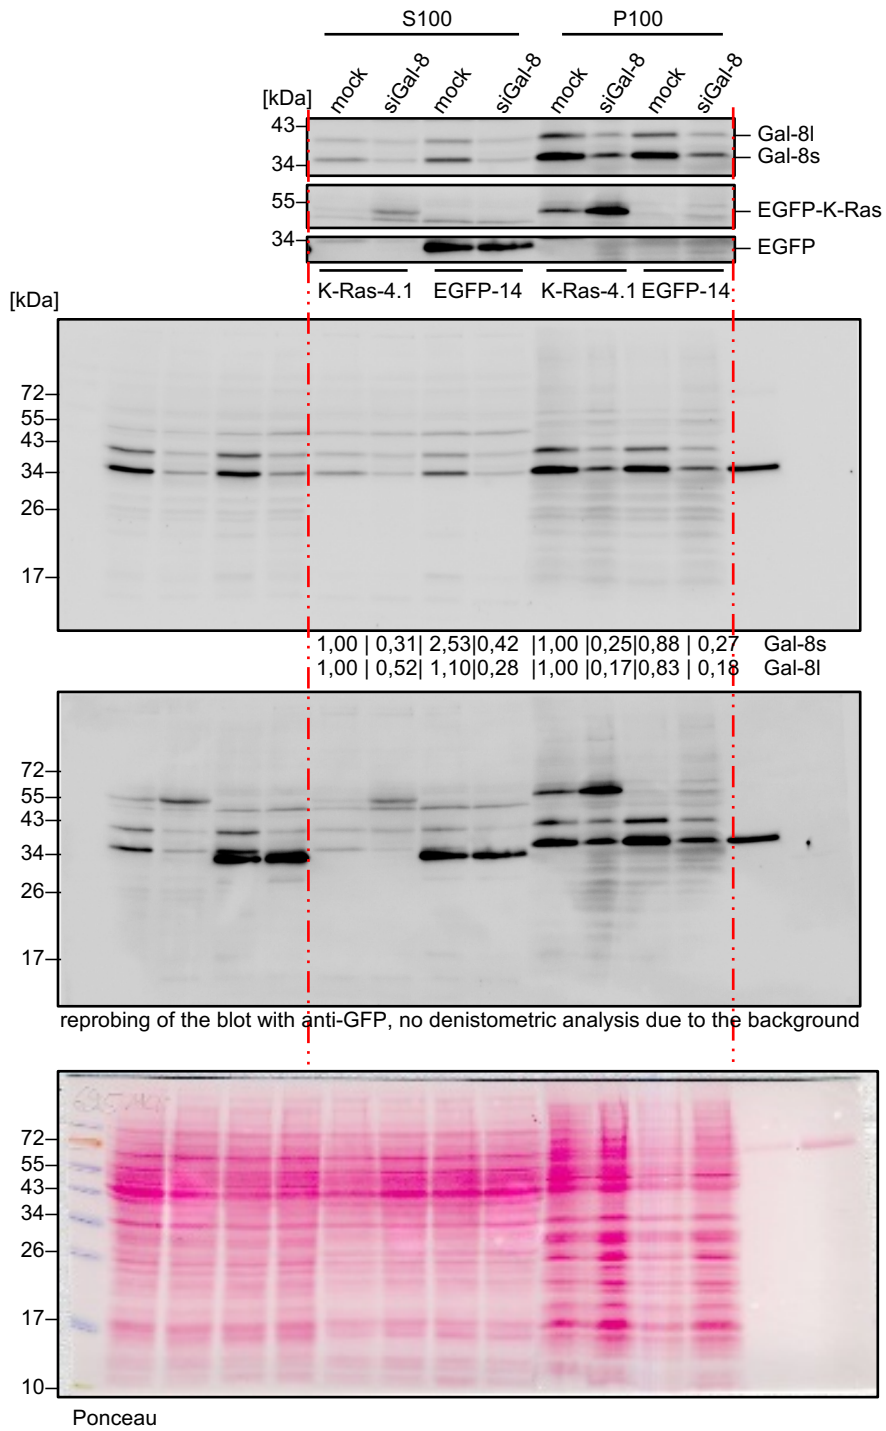

Fig.3

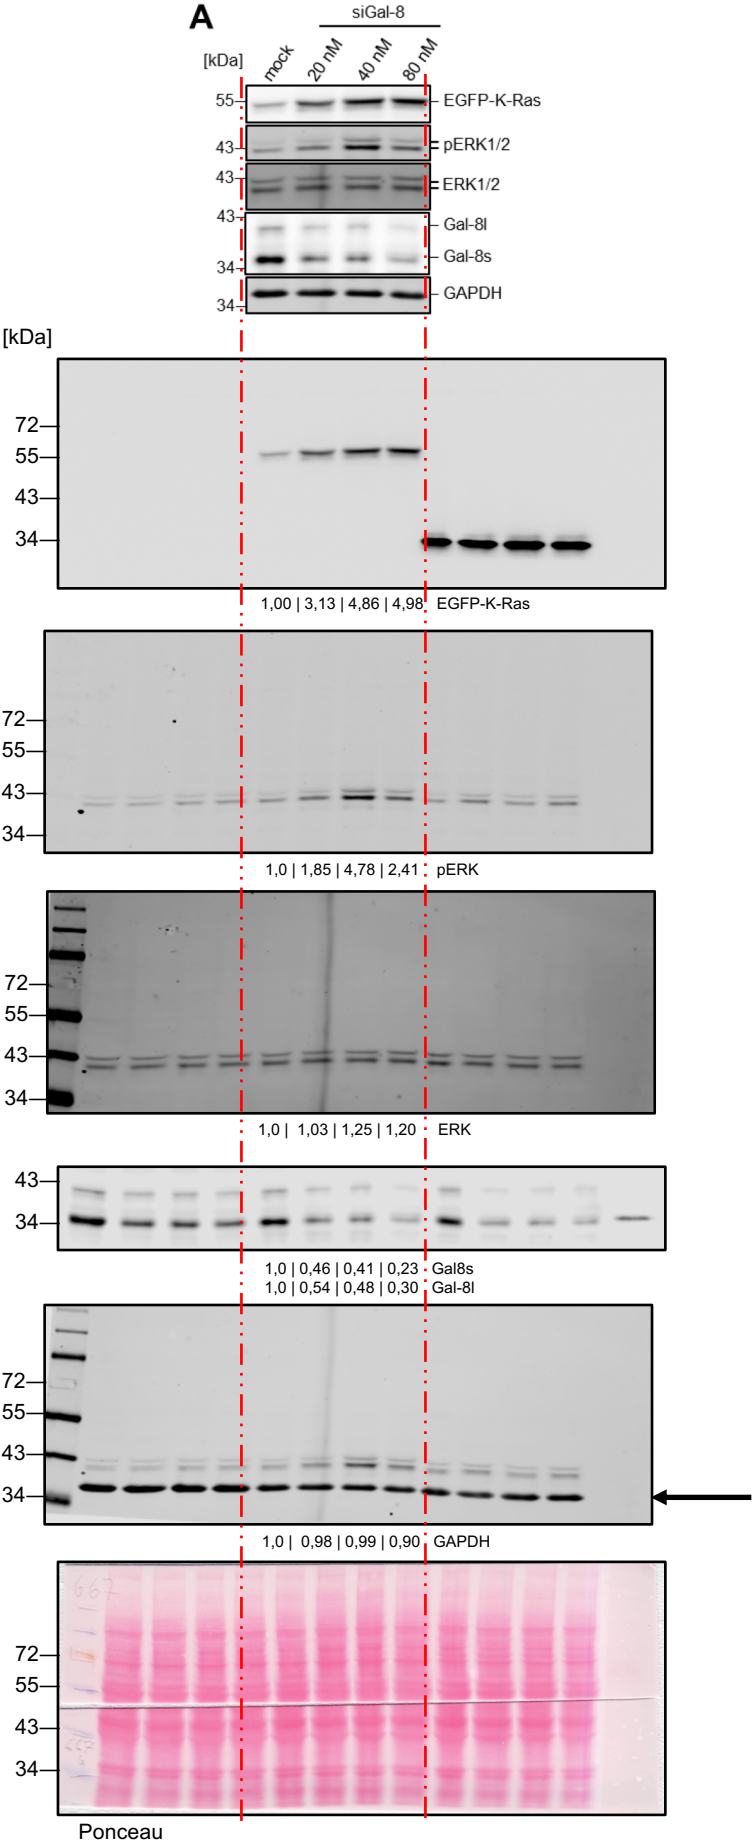

Fig.3

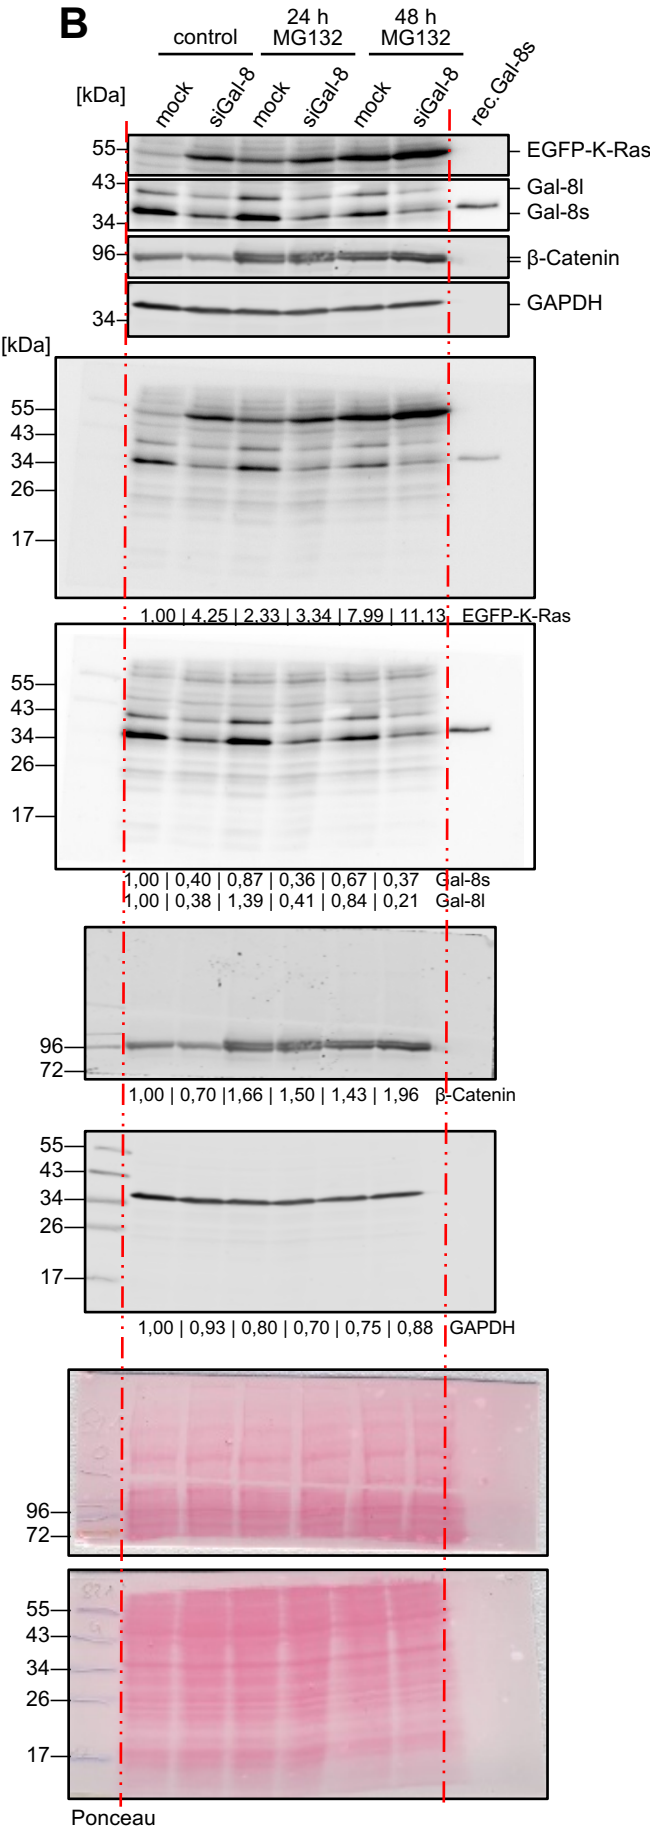

Fig.4

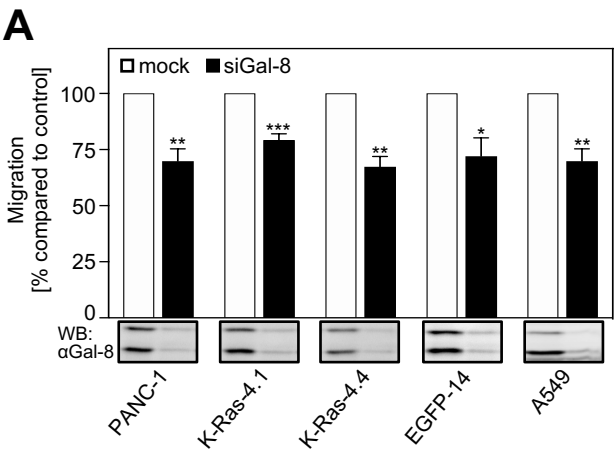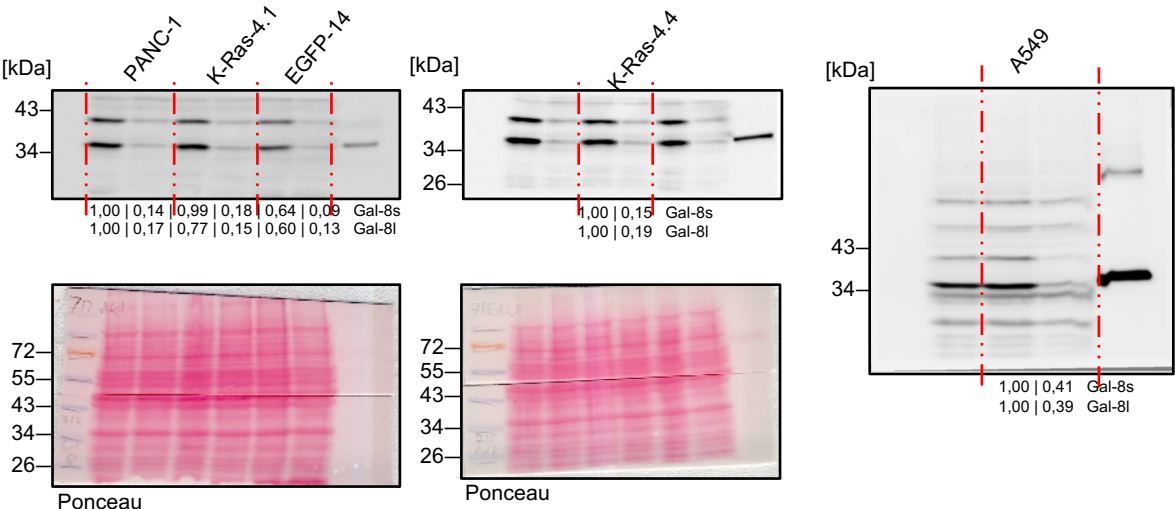



Fig.4

B

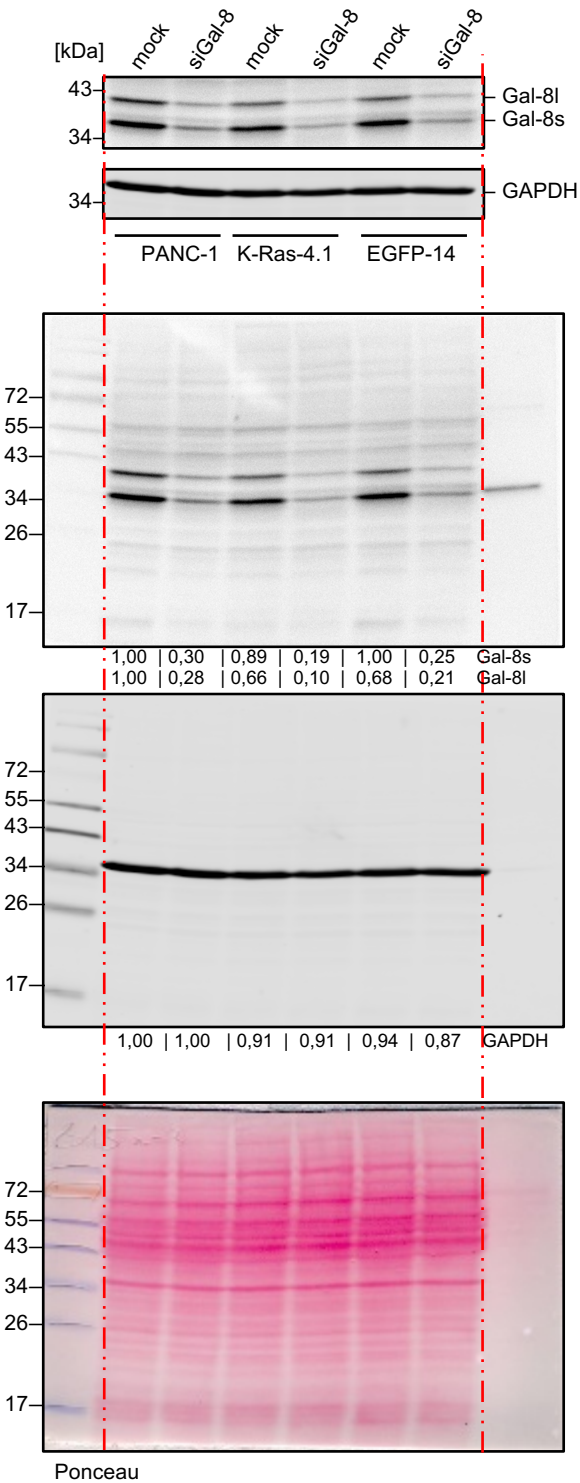

Fig.5

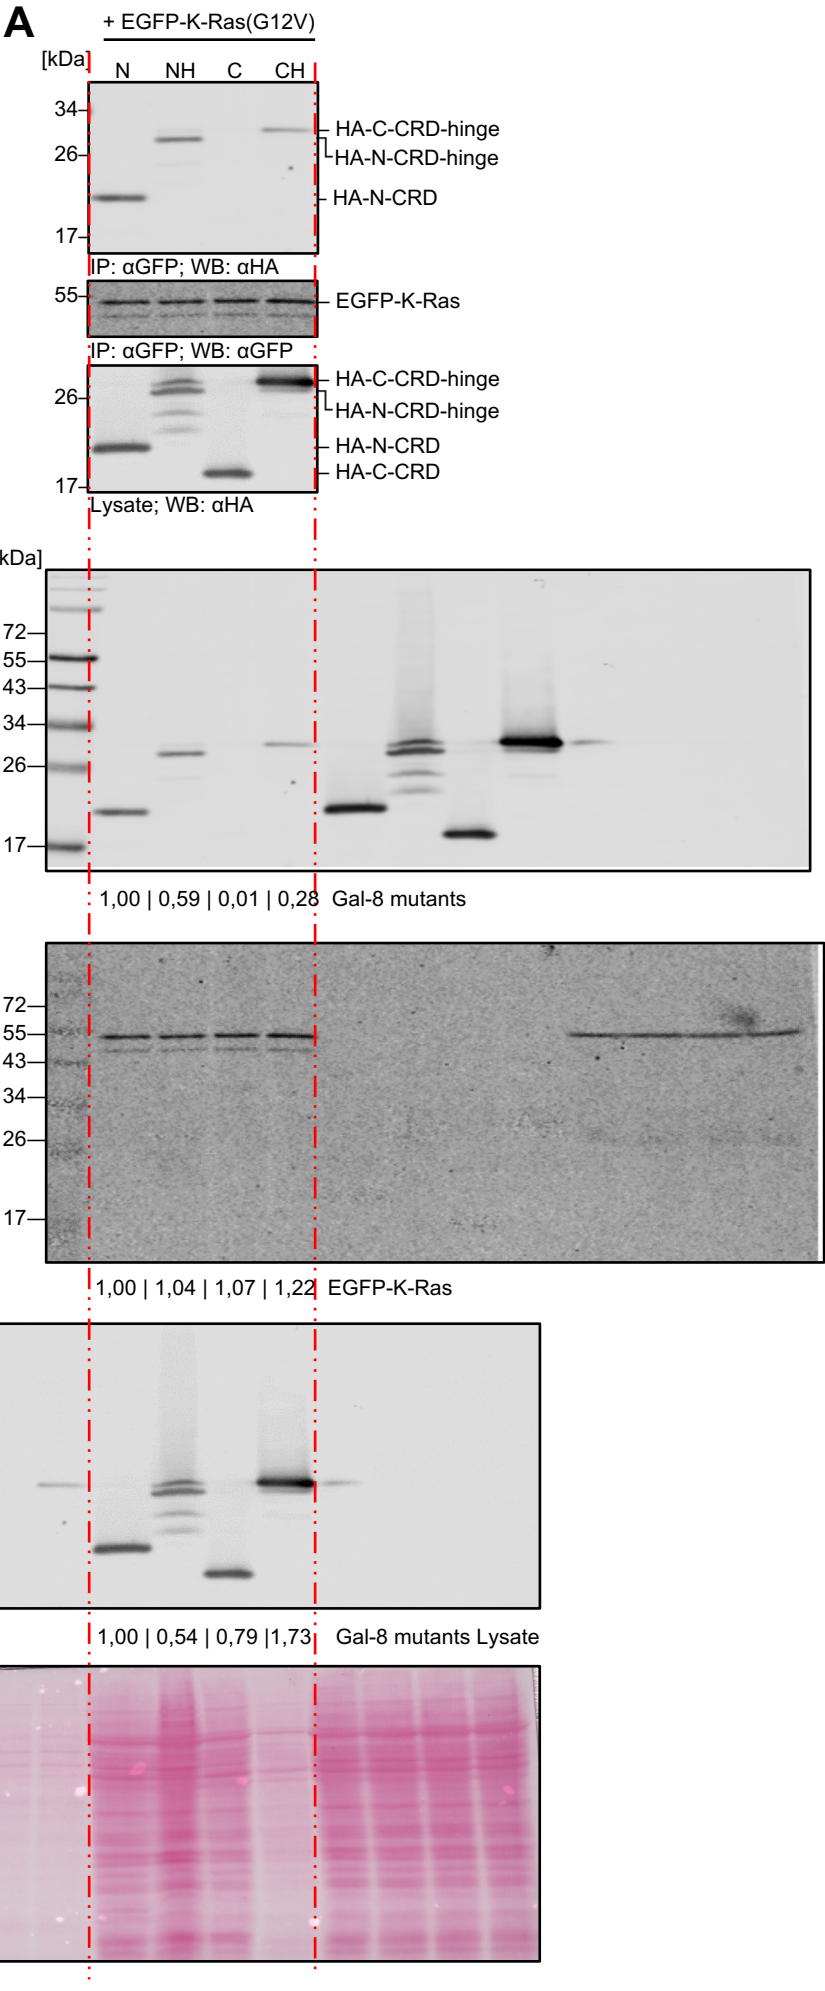

Fig.5

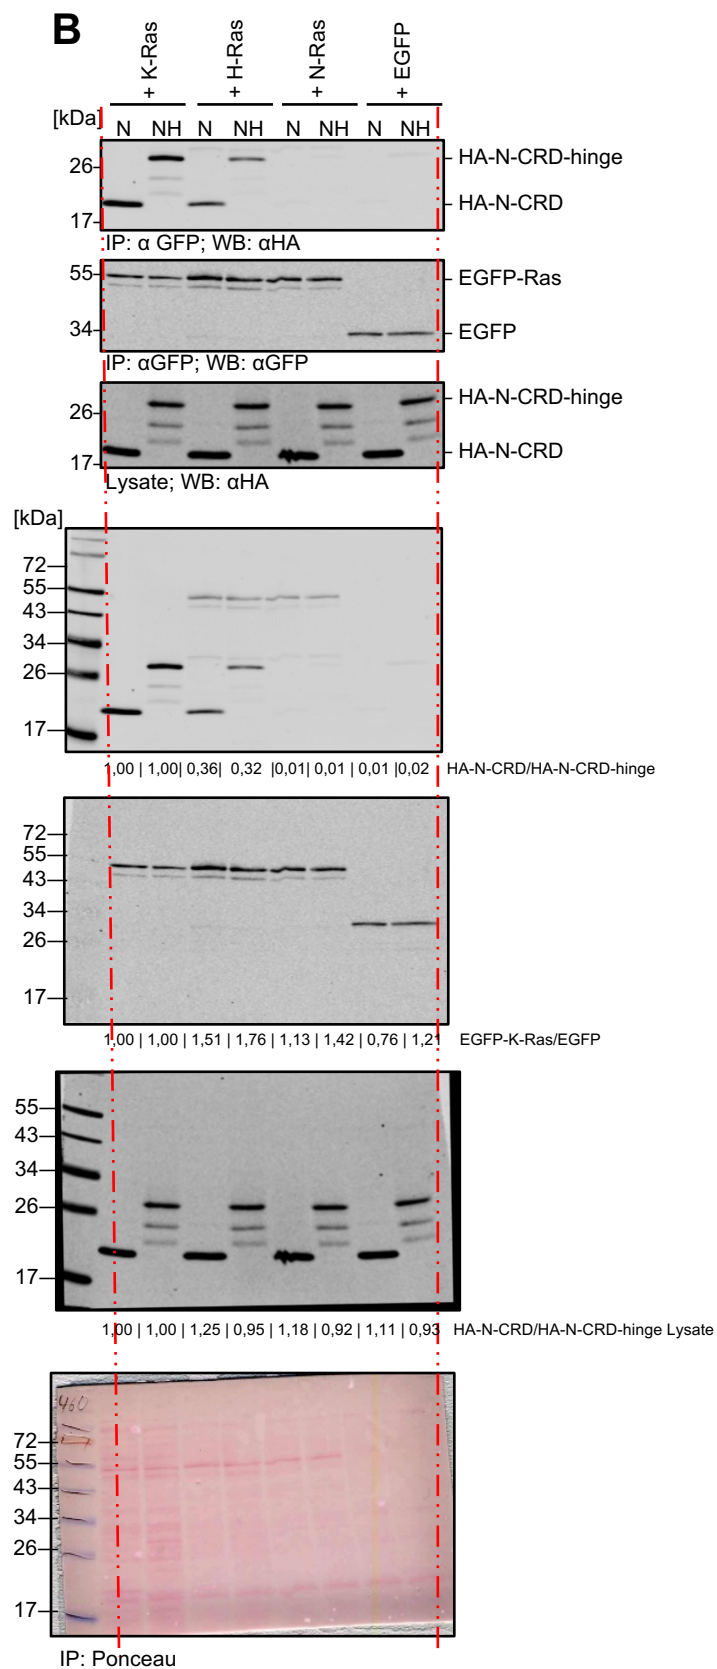

Fig.5

C

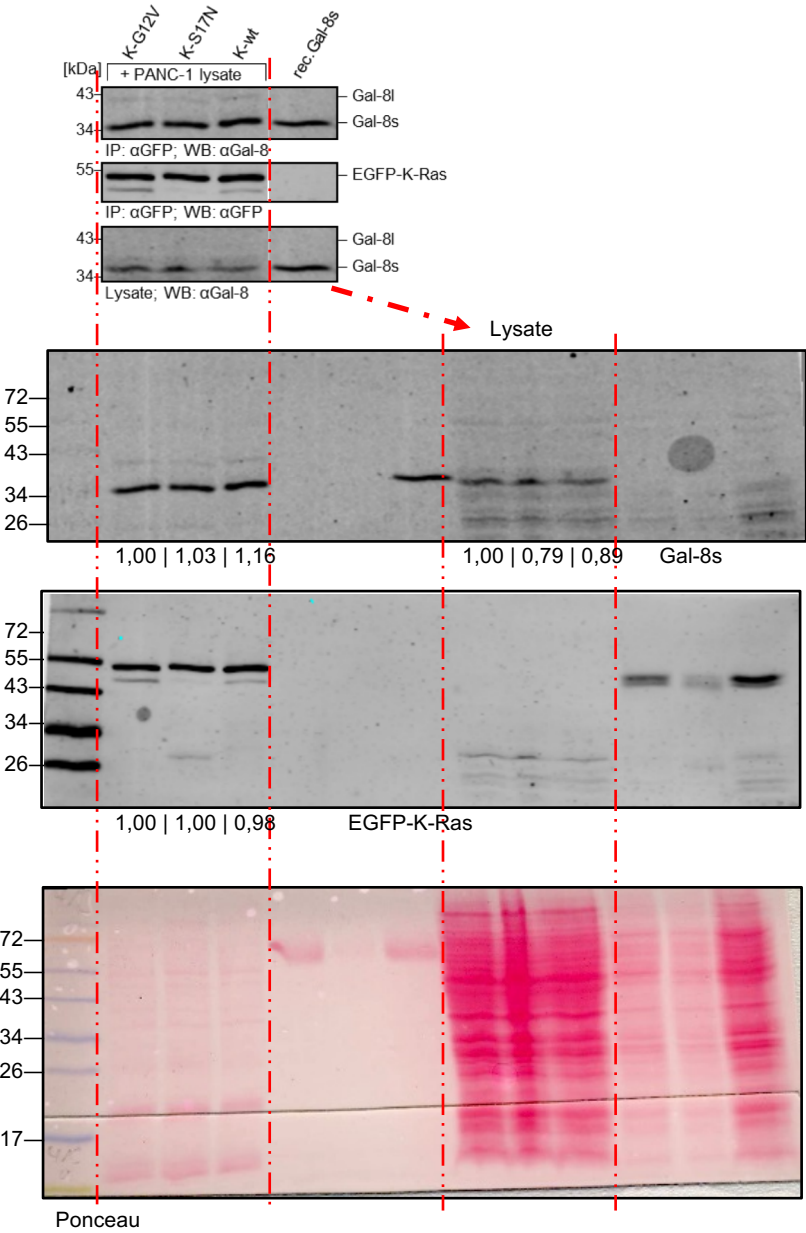

Fig.5 D

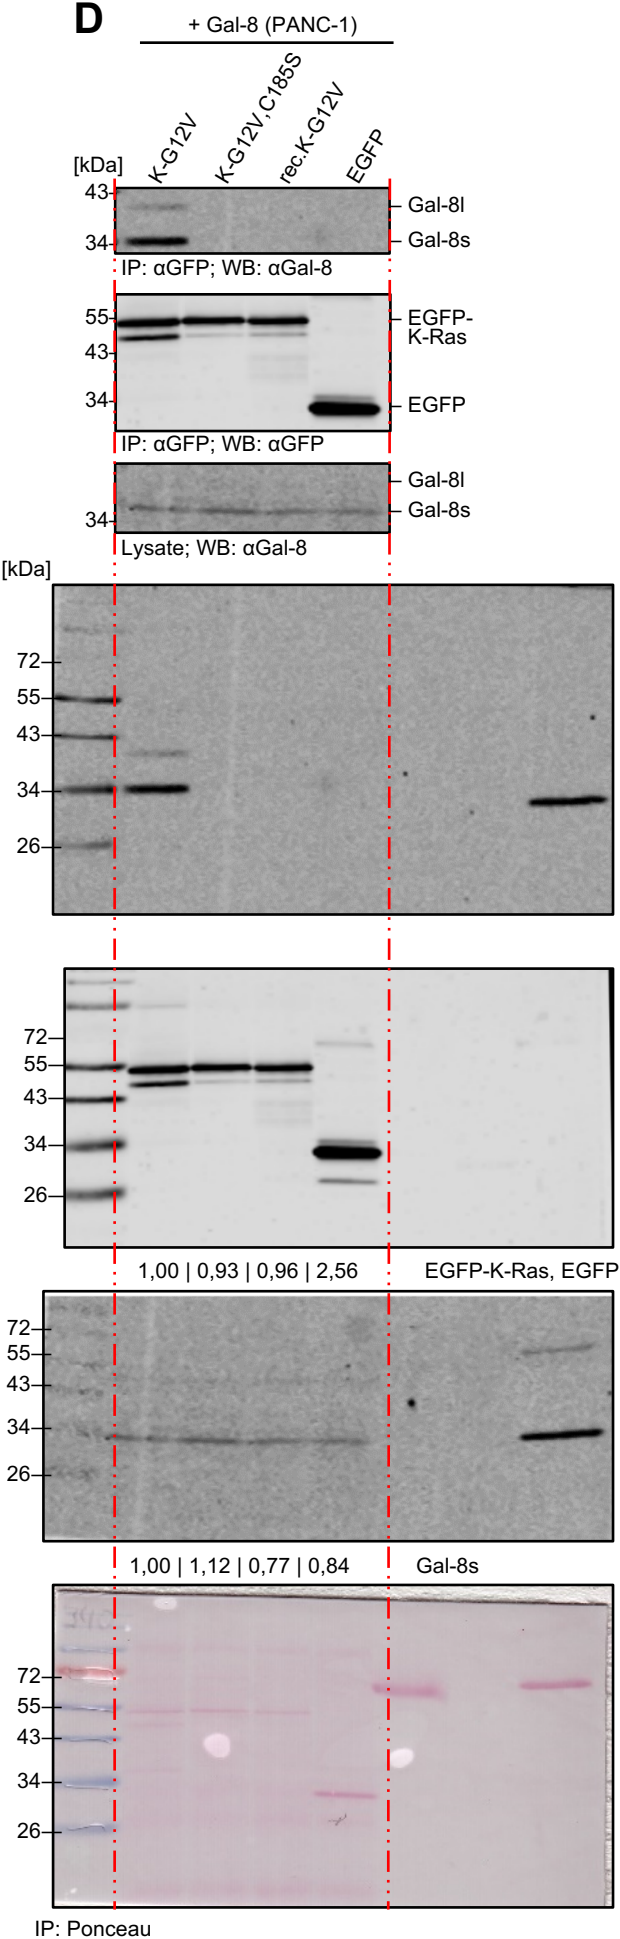

Fig.5 E

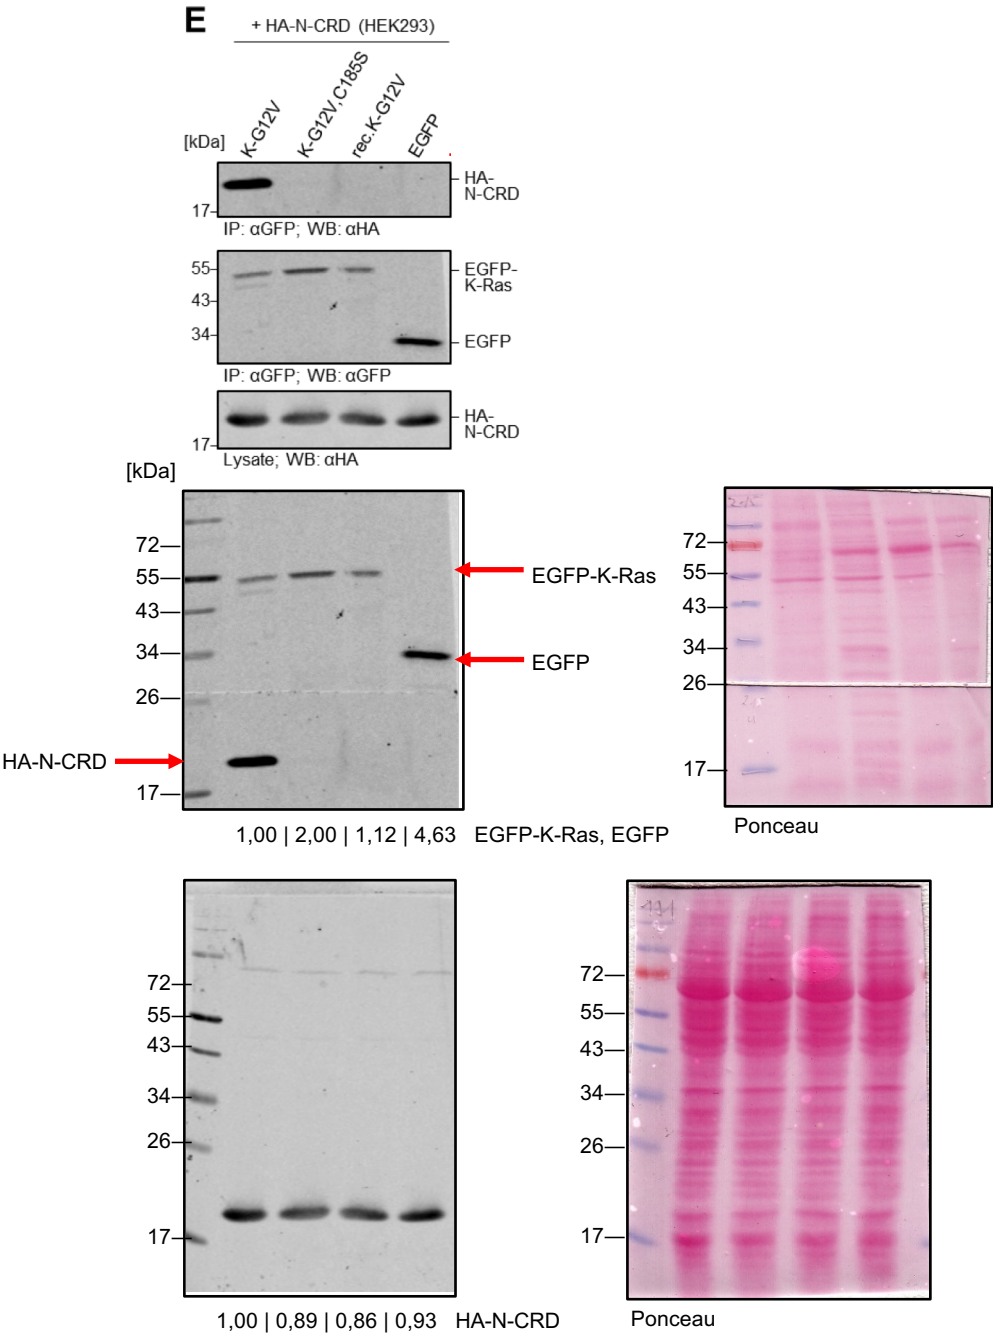

**Fig.5 F**

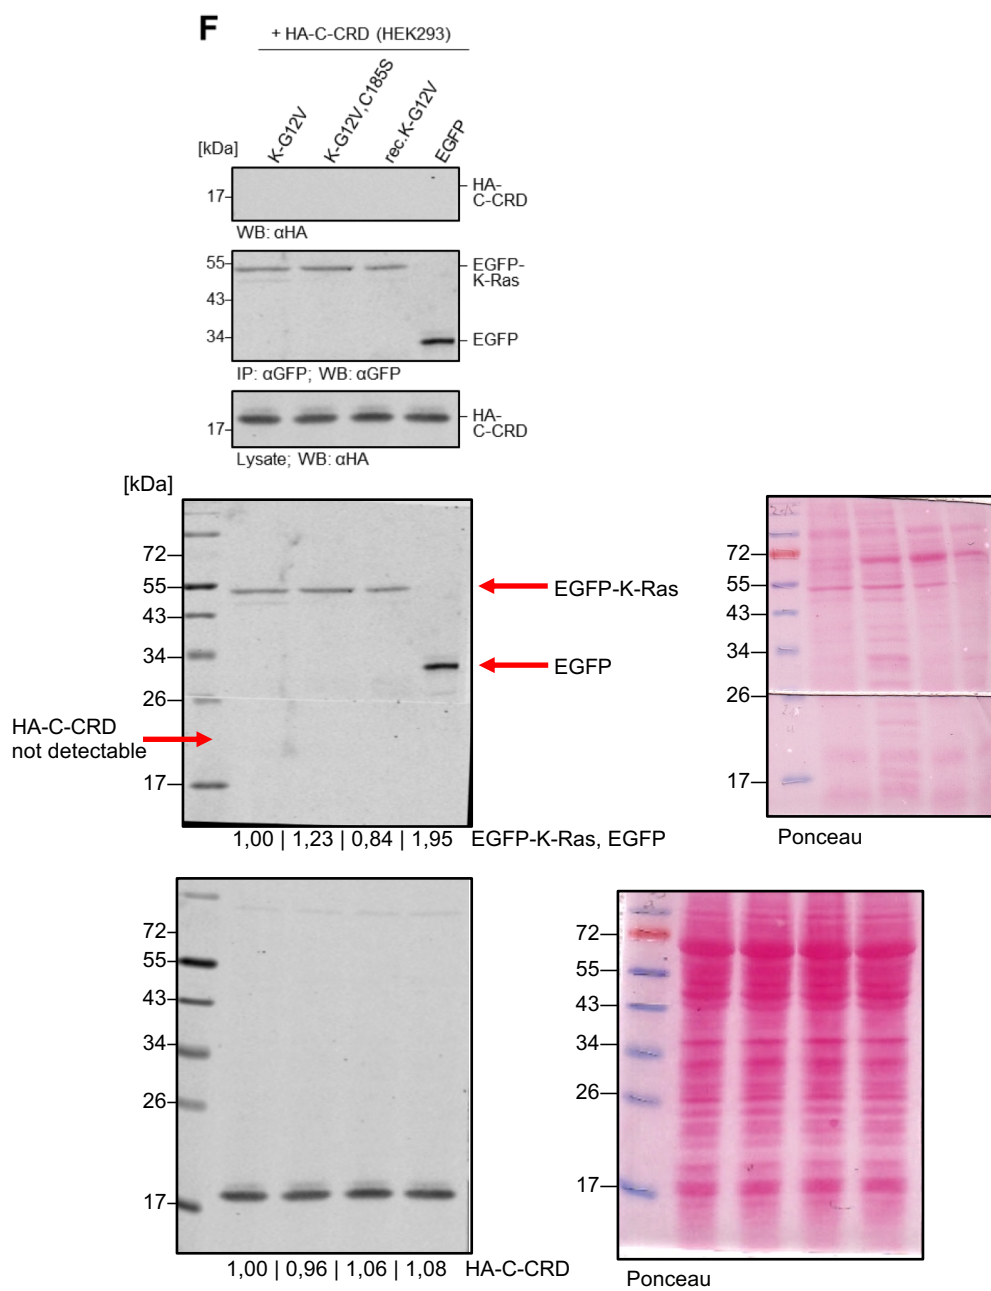



Fig.6

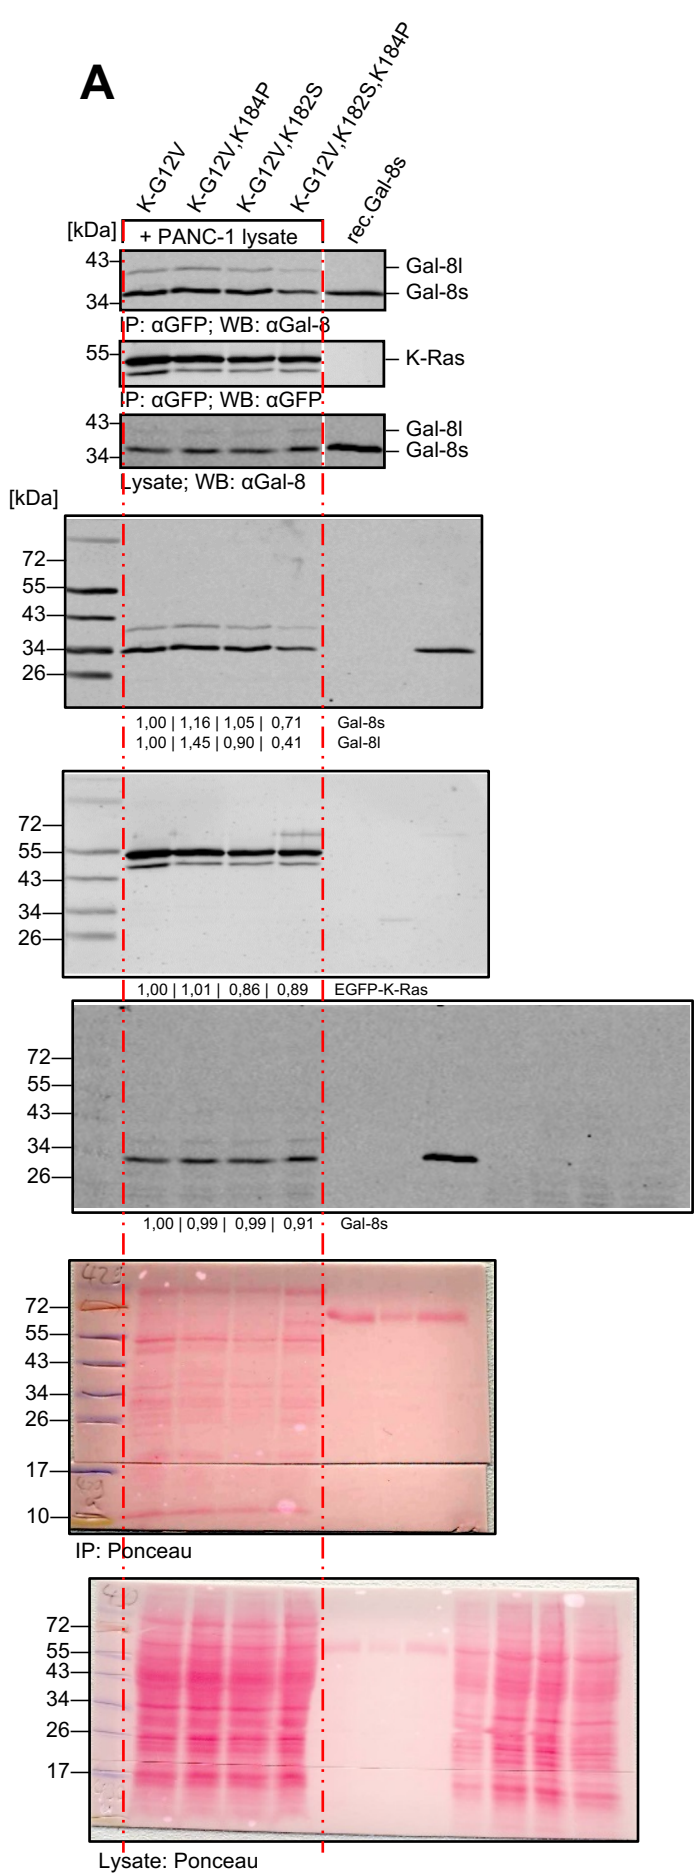



Fig.6

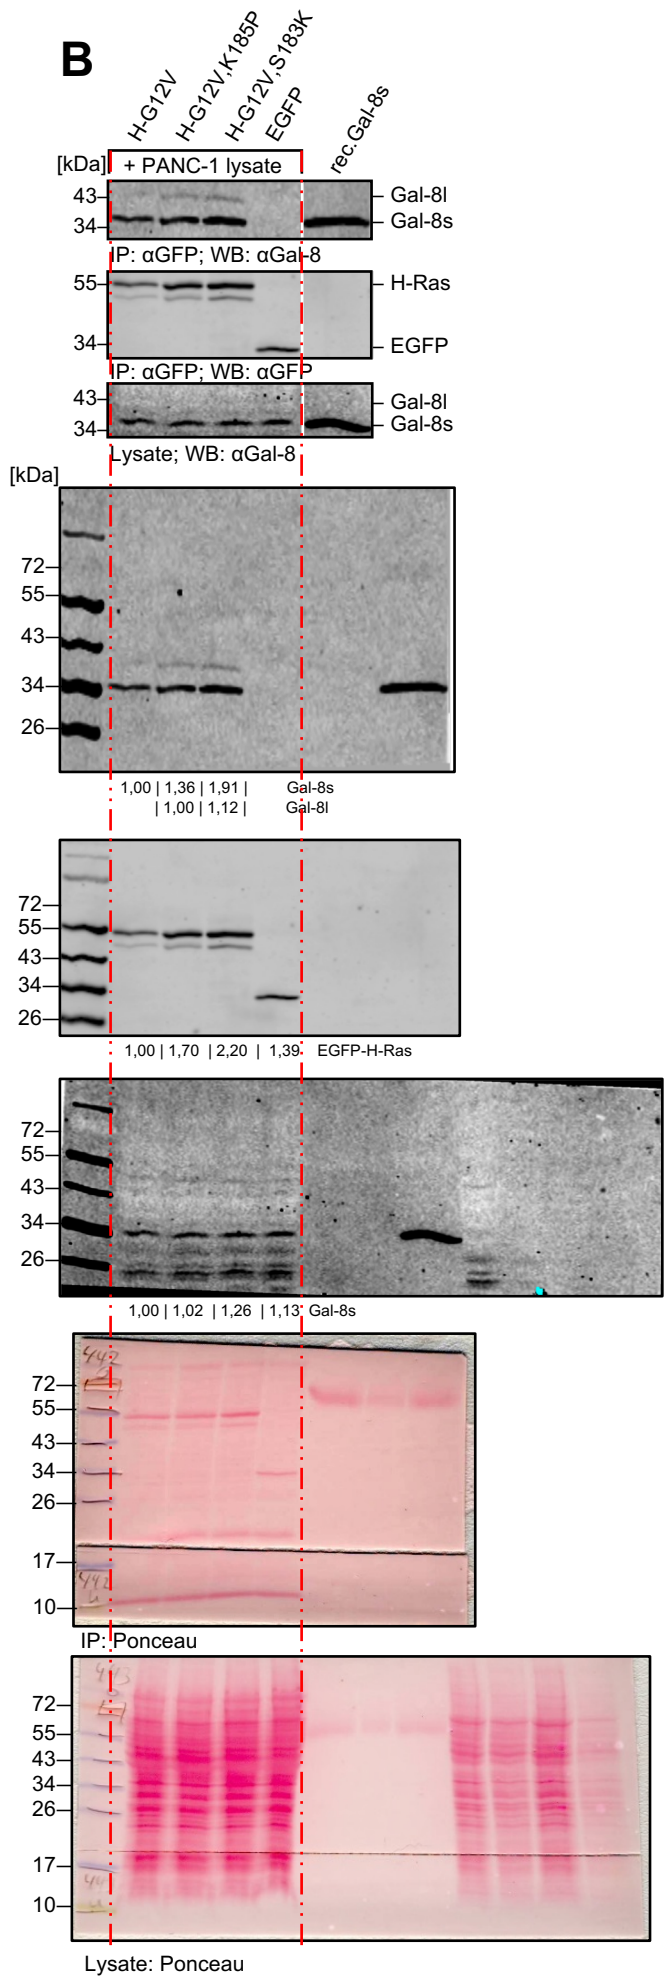

Fig.6

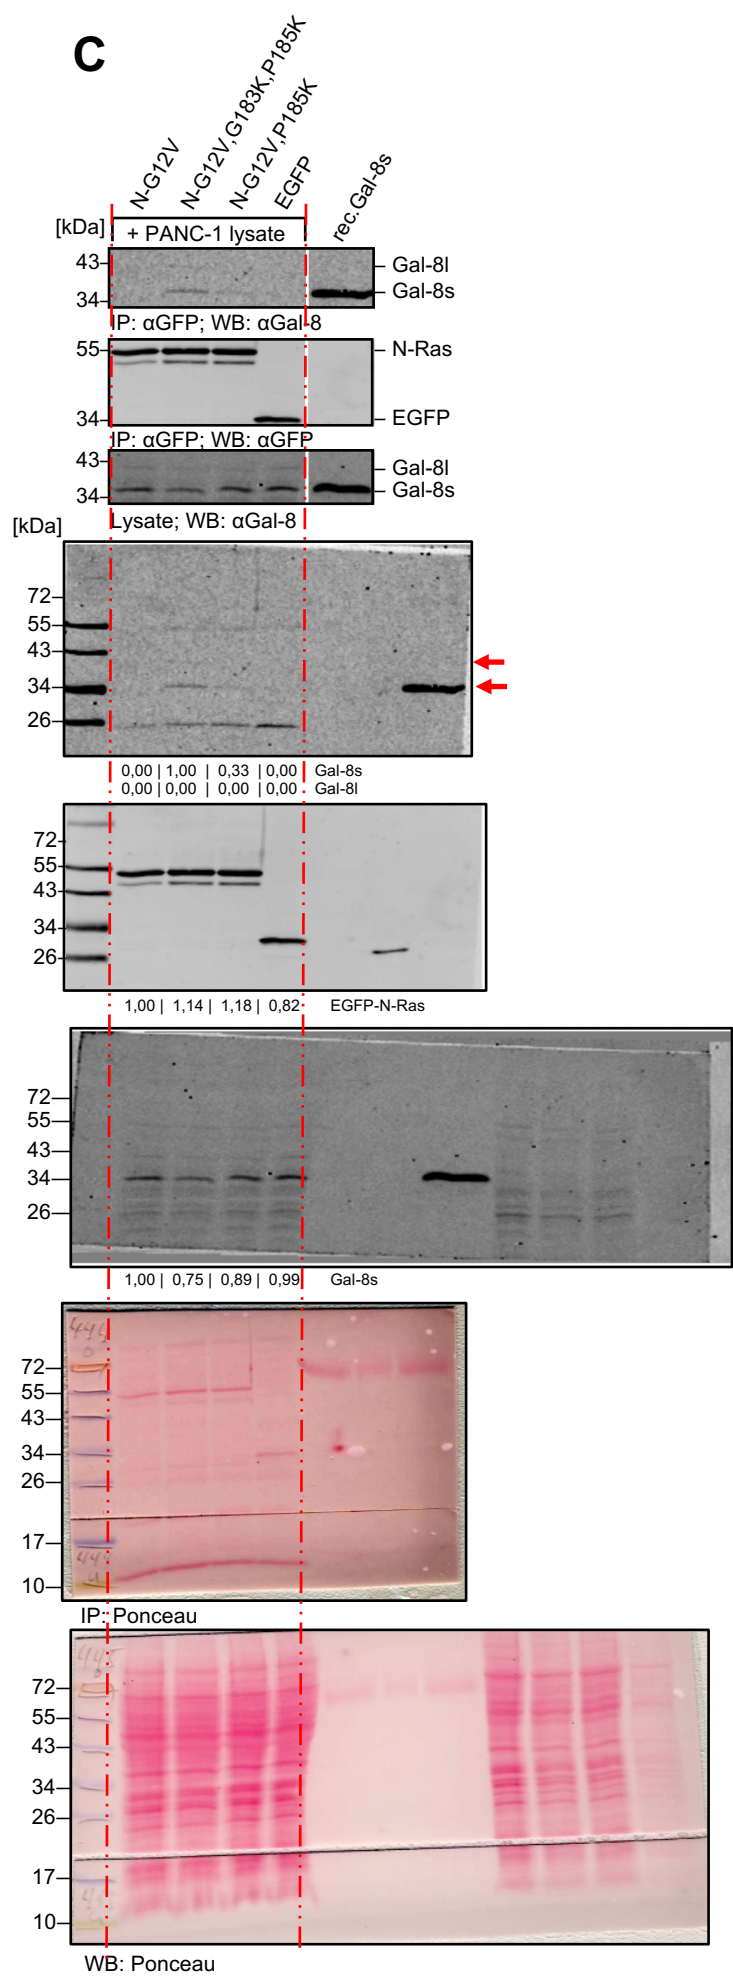

Fig.7

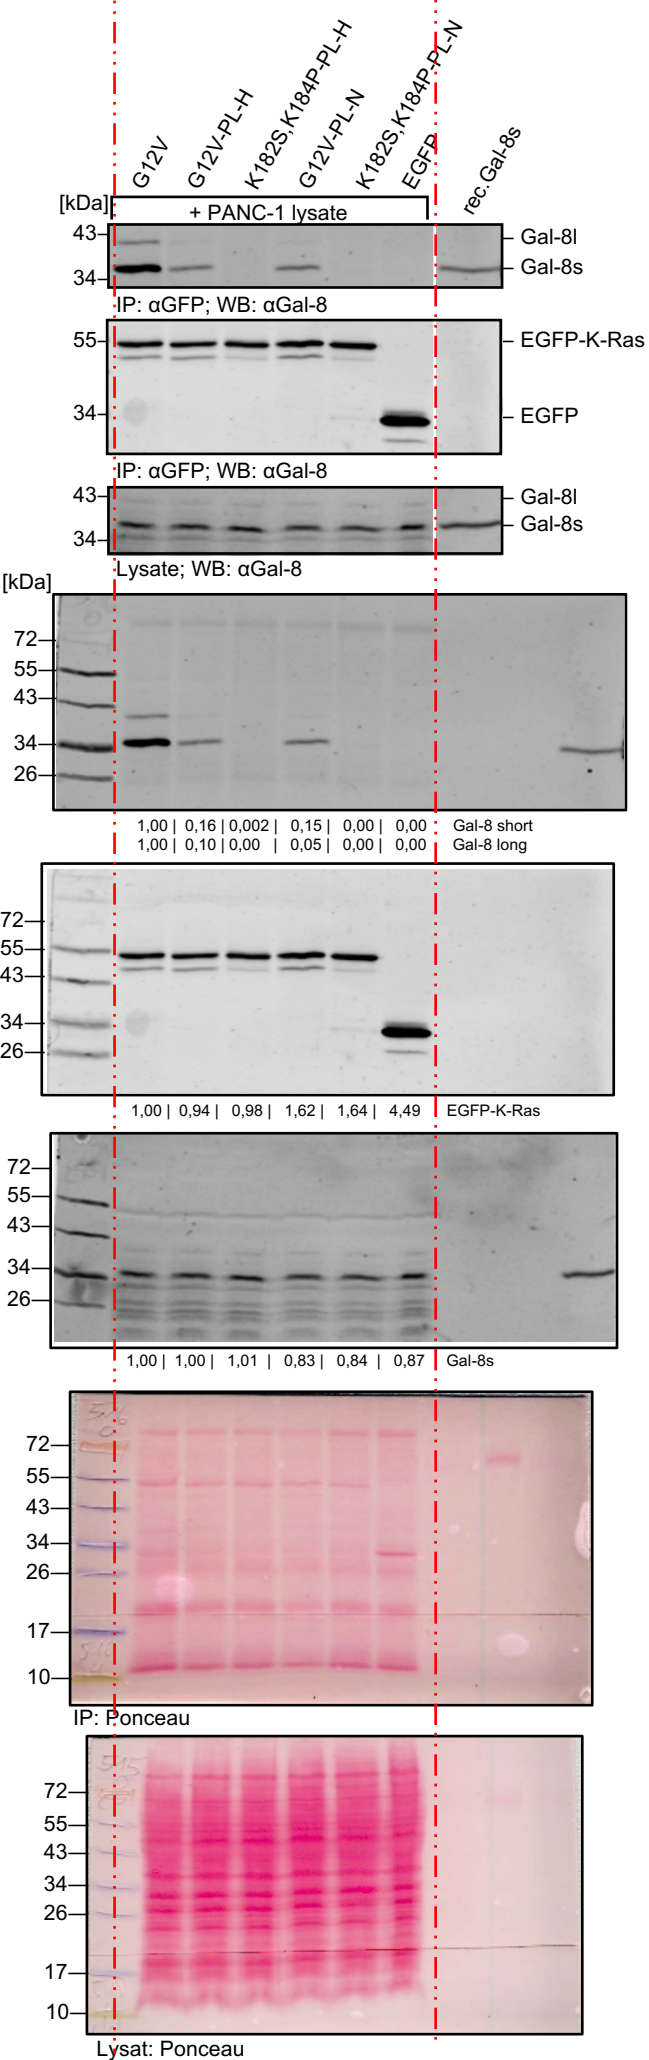

Fig.S1

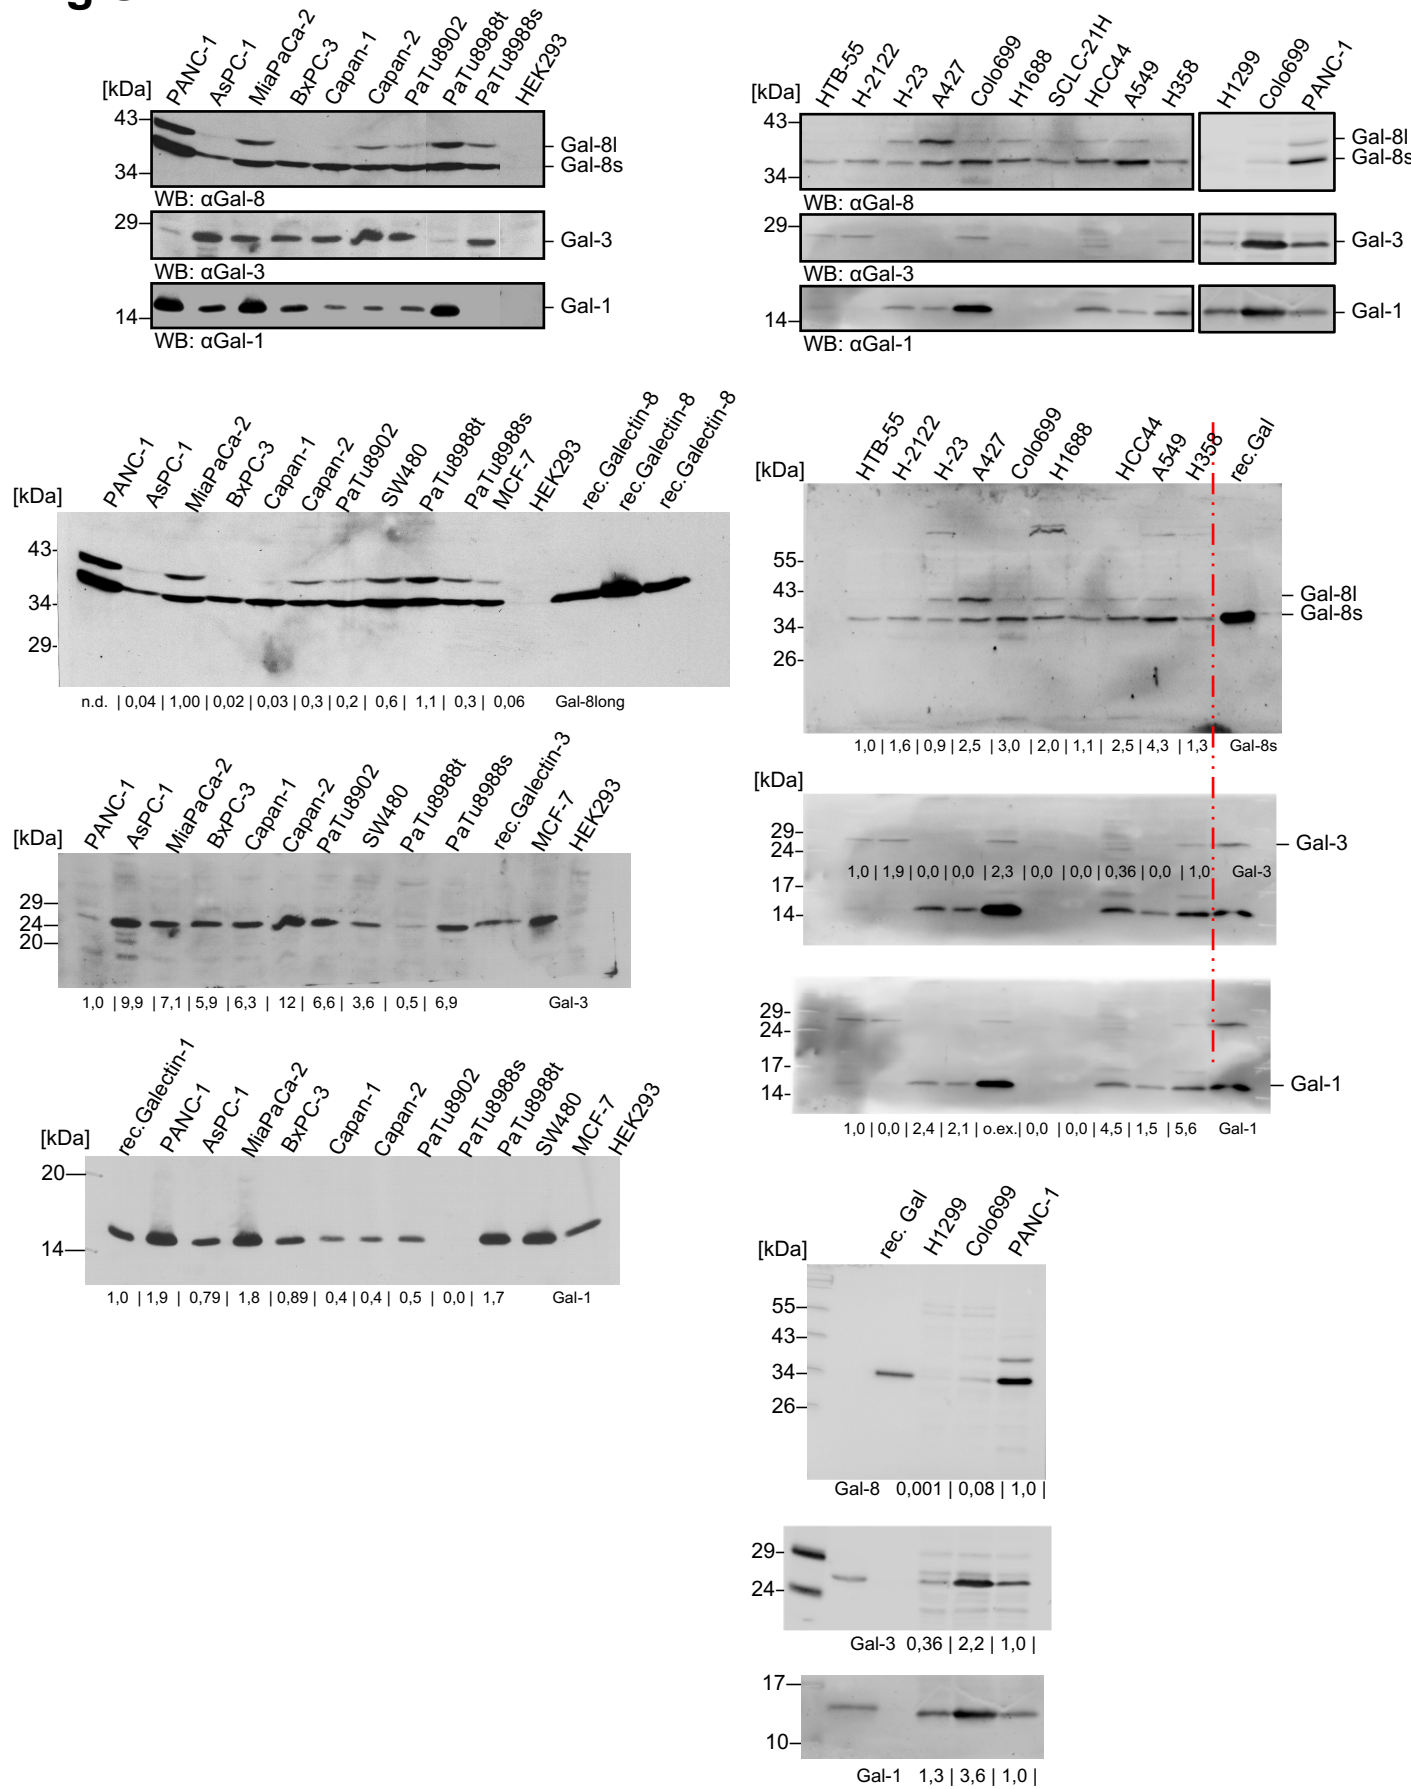

## Fig.S2

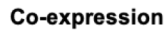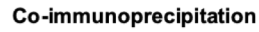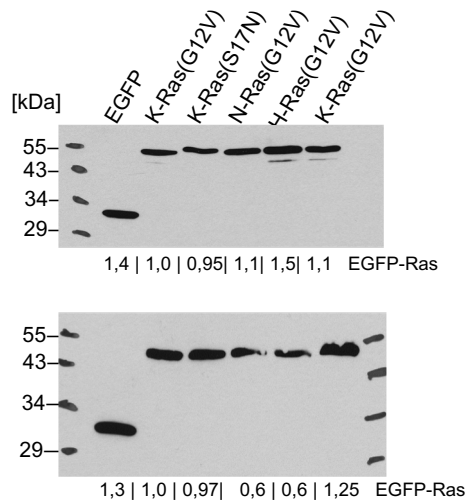



Fig.S2

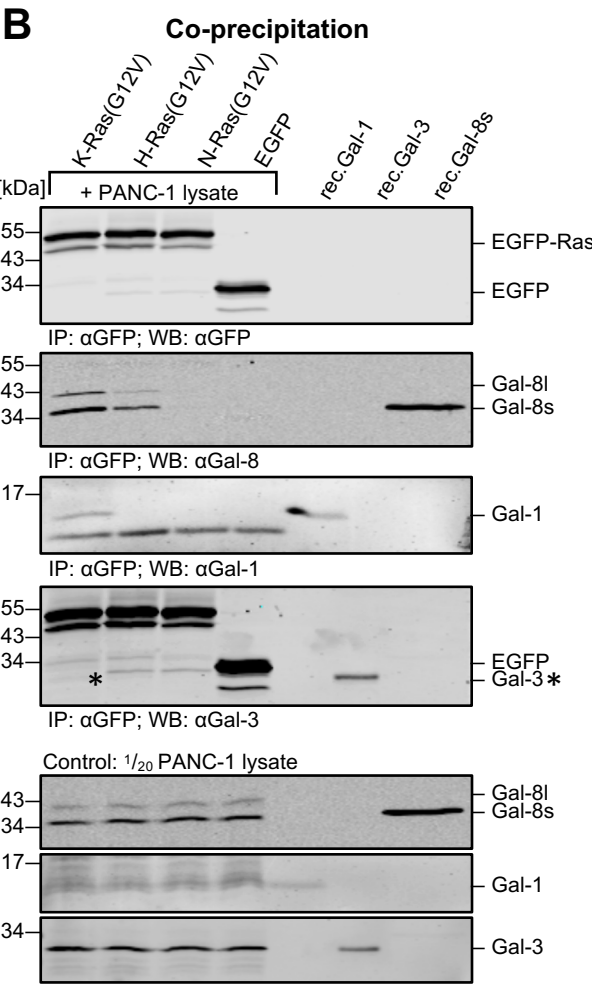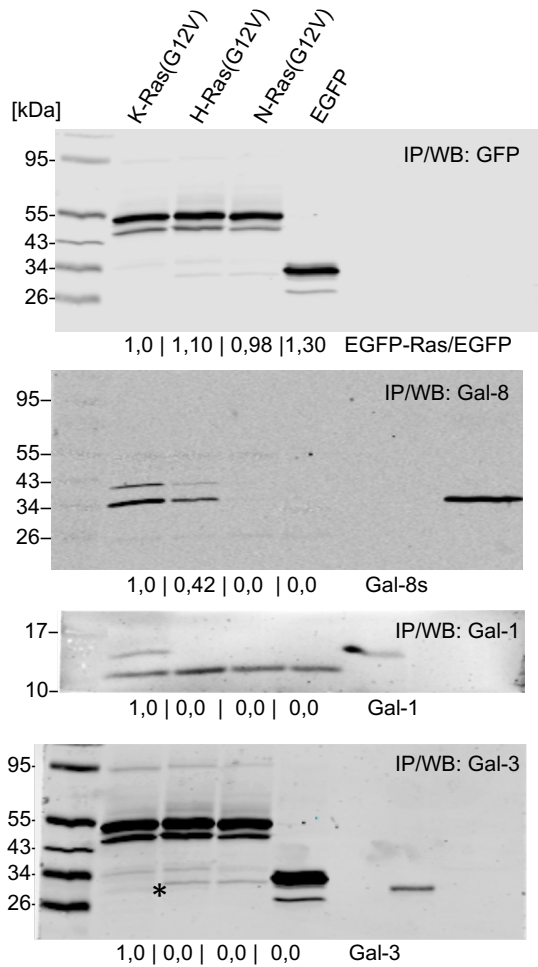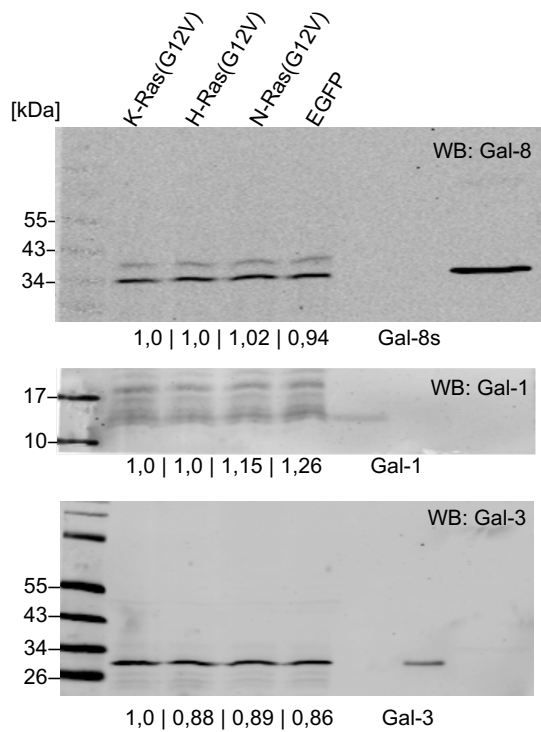

### Fig.S3

**A**

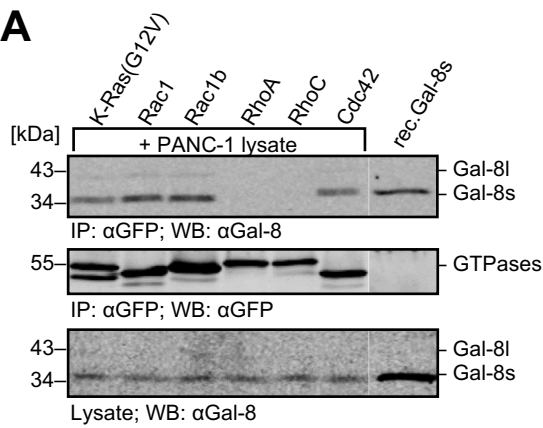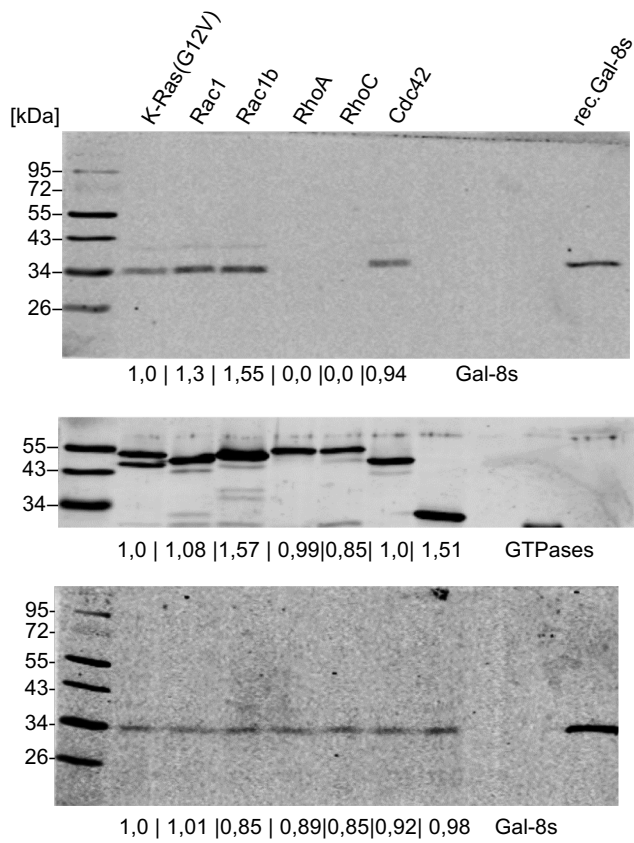

# B

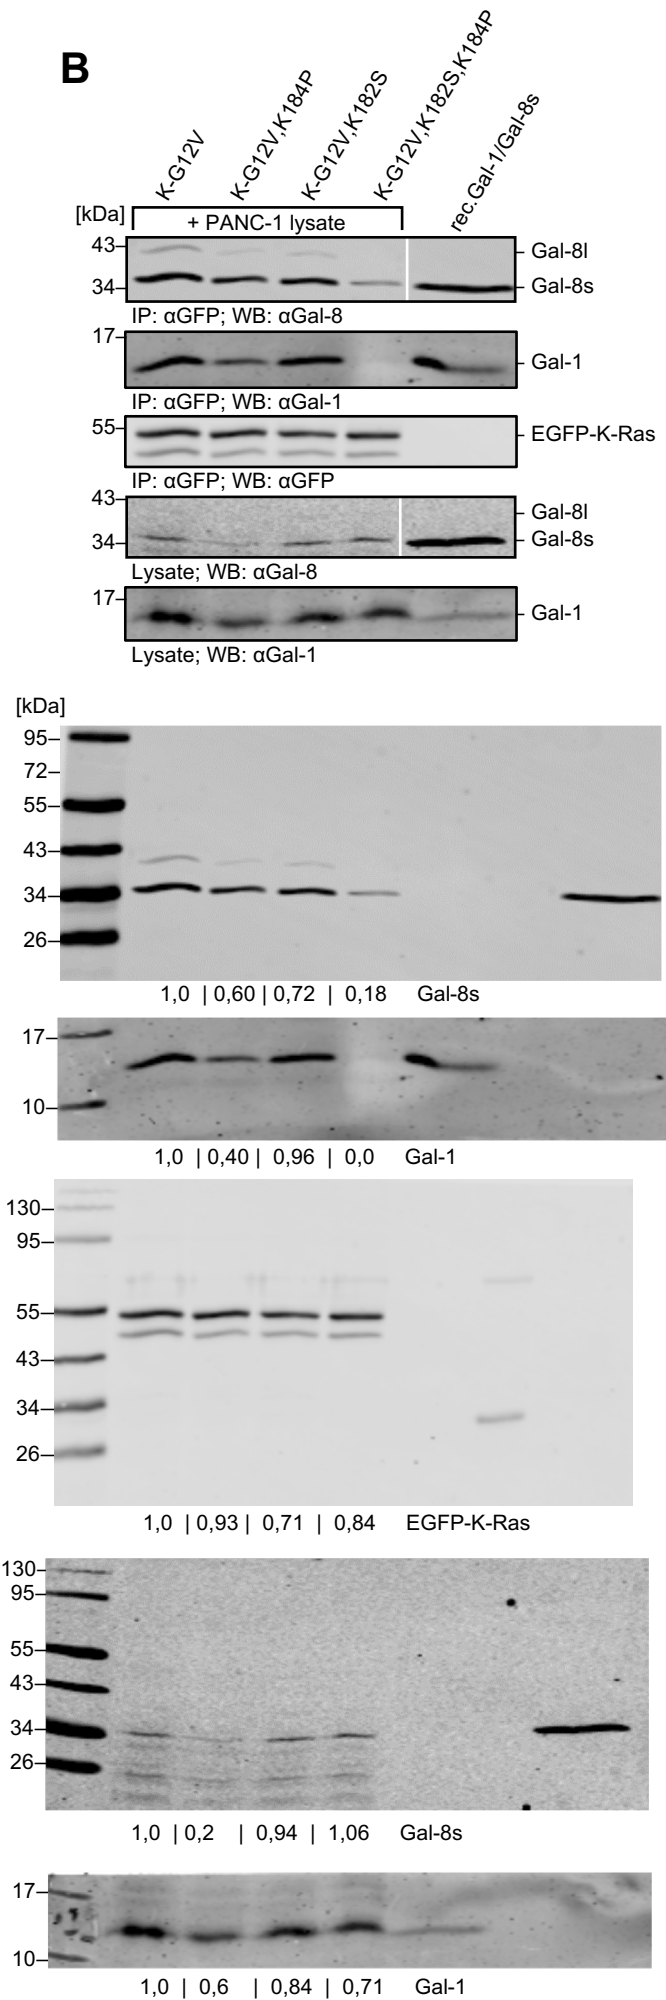

Supplement: s1 [file s1]
